# Supplementary material
Source: PubMed Central journal article supplement (PMC7103276)
Supplement: mmc2.pdf [file mmc2.pdf]

Supplementary Table S1: RepB\_pMV158 homologs

| Plasmid name <sup>a</sup> | Replication initiation protein<br>GenBank Acc. No. | Initiator tree cluster <sup>b</sup> | Nucleotide GenBank Acc. No. | Relaxase GenBank Acc. No. | Host                              | Other traits of interest (virulence and<br>antibiotic-resistance genes) <sup>c</sup> |
|---------------------------|----------------------------------------------------|-------------------------------------|-----------------------------|---------------------------|-----------------------------------|--------------------------------------------------------------------------------------|
| pMV158                    | YP_001586272.1                                     | pMV158                              | NC_010096.1                 | YP_001586274.1            | <i>Streptococcus agalactiae</i>   | Tc                                                                                   |
| pW2580                    | YP_001649327.1                                     | pMV158                              | NC_010260.1                 |                           | <i>Streptococcus dysgalactiae</i> | dysgalacticin                                                                        |
| pDN281                    | YP_001648846.1                                     | pMV158                              | NC_010230.1                 |                           | <i>Streptococcus pyogenes</i>     | disgalacticin                                                                        |
| pSdyT132                  | YP_001966519.1                                     | pMV158                              | NC_010907.1                 |                           | <i>Streptococcus dysgalactiae</i> | disgalacticin                                                                        |
| pA852                     | YP_008414910.1                                     | pMV158                              | NC_022077.1                 |                           | <i>Streptococcus pyogenes</i>     | bacteriocin                                                                          |
| pRW35                     | YP_001716199.1                                     | pMV158                              | NC_010423.2                 | YP_001716200.1            | <i>Streptococcus pyogenes</i>     | Mac                                                                                  |
| p121B5                    | NP_862544.1                                        | pMV158                              | NC_004957.1                 |                           | <i>Lactobacillus sp.</i>          | Ery                                                                                  |
| pSBO2                     | BAA75016.1                                         | pMV158                              | A8021465.1                  | BAA75017.1                | <i>Streptococcus bovis</i>        |                                                                                      |
| pSSU1                     | NP_053058.1                                        | pSSU1                               | NC_002140.1                 | NP_053061.1               | <i>Streptococcus suis</i>         |                                                                                      |
| pLS55                     | YP_001691308.1                                     | pSSU1                               | NC_010375.1                 | YP_001691307.1            | <i>Lactobacillus sakei</i>        | Tc                                                                                   |
| pMA67                     | YP_001966008.1                                     | pSSU1                               | NC_010875.1                 | YP_001966010.1            | <i>Paenibacillus larvae</i>       | Tc                                                                                   |
| pJB01                     | YP_138502.1                                        | pSSU1                               | NC_006427.1                 |                           | <i>Enterococcus faecium</i>       |                                                                                      |
| pPF107-3                  | CAA73217.1                                         | pSSU1                               | Y12675.1                    |                           | <i>Lactococcus lactis</i>         |                                                                                      |
| pLS141-1                  | BAC99041.1                                         | pSSU1                               | AB109041.1                  |                           | <i>Lactobacillus sakei</i>        |                                                                                      |
| pYC2                      | YP_002333849.1                                     | pSSU1                               | NC_011652.1                 |                           | <i>Lactobacillus sakei</i>        |                                                                                      |
| pLF24                     | YP_002455777.1                                     | pSSU1                               | NC_011798.1                 |                           | <i>Lactobacillus farciminis</i>   |                                                                                      |
| pXY3                      | YP_003422740.1                                     | pSSU1                               | NC_013789.1                 |                           | <i>Lactobacillus plantarum</i>    |                                                                                      |
| pLH2                      | CAA57504.1                                         | pSSU1                               | X81981.1                    |                           | <i>Lactobacillus helveticus</i>   |                                                                                      |
| LkipL48                   | YP_003620511.1                                     | pSSU1                               | NC_014135.1                 | YP_003620509.1            | <i>Leuconostoc kimchii</i>        |                                                                                      |
| pYSI8                     | YP_001967739.1                                     | pSSU1                               | NC_010936.1                 | YP_001967741.1            | <i>Lactobacillus sakei</i>        | Lin                                                                                  |
| pMBLR00                   | YP_006964794.1                                     | pSSU1                               | NC_019353.1                 | YP_006964795.1            | <i>Leuconostoc mesenteroides</i>  |                                                                                      |
| pLB925A01                 | YP_002790951.1                                     | pSSU1                               | NC_012548.1                 |                           | <i>Lactobacillus brevis</i>       |                                                                                      |
| pLP5403                   | YP_008130405.1                                     | pSSU1                               | NC_021574.1                 |                           | <i>Lactobacillus paracasei</i>    |                                                                                      |
| pWCF5102                  | YP_133712.1                                        | pSSU1                               | NC_006376.1                 |                           | <i>Lactobacillus plantarum</i>    |                                                                                      |
| pLP89                     | ABY86900.1                                         | pSSU1                               | EU391630.1                  |                           | <i>Lactobacillus plantarum</i>    |                                                                                      |
| pGL2                      | YP_005352348.1                                     | pSSU1                               | NC_016981.1                 | YP_005352352.1            | <i>Lactococcus garvieae</i>       |                                                                                      |
| pSMQ172                   | NP_862546.1                                        | pSSU1                               | NC_004958.1                 | NP_862547.1               | <i>Streptococcus thermophilus</i> |                                                                                      |
| pER13                     | NP_115335.1                                        | pSSU1                               | NC_002776.1                 | NP_115336.1               | <i>Streptococcus thermophilus</i> |                                                                                      |
| pKLO018                   | YP_001798650.1                                     | pSSU1                               | NC_010540.1                 |                           | <i>Lactococcus garvieae</i>       | Mac, Tc                                                                              |
| pCPS49                    | YP_006958109.1                                     | pCPS49                              | NC_019142.1                 | YP_006958108.1            | <i>Staphylococcus aureus</i>      | PLS(A)                                                                               |
| pWV01                     | NP_053450.1                                        | pWV01                               | NC_002192.1                 |                           | <i>Lactococcus lactis</i>         |                                                                                      |
| pLP18                     | YP_003965463.1                                     | pWV01                               | NC_014627.1                 |                           | <i>Lactobacillus plantarum</i>    |                                                                                      |
| pPSC22                    | CAA65101.1                                         | pWV01                               | X95843.1                    |                           | <i>Lactobacillus plantarum</i>    |                                                                                      |
| pKMK1                     | AAA25437.1                                         | pKMK1                               | M81470.1                    |                           | <i>Mycoplasma mycoides</i>        |                                                                                      |
| pMG1A-1                   | YP_007183021.1                                     | pKMK1                               | NC_019796.1                 |                           | <i>Mycoplasma mycoides</i>        |                                                                                      |
| pMG1B-1                   | YP_007173698.1                                     | pKMK1                               | NC_019788.1                 |                           | <i>Mycoplasma capricolum</i>      |                                                                                      |
| pMG1C-1                   | YP_007173690.1                                     | pKMK1                               | NC_019784.1                 |                           | <i>Mycoplasma mycoides</i>        |                                                                                      |
| pMmc-95010                | YP_007013564.1                                     | pKMK1                               | NC_015407.1                 |                           | <i>Mycoplasma mycoides</i>        |                                                                                      |
| SAP085B                   | YP_006938614.1                                     | SAP085B                             | NC_013345.1                 | YP_006938616.1            | <i>Staphylococcus aureus</i>      | MLS(B)                                                                               |
| pDLK3                     | YP_003537100.1                                     | SAP085B                             | NC_013969.1                 |                           | <i>Staphylococcus aureus</i>      |                                                                                      |
| SAP099B                   | YP_006938723.1                                     | SAP099B                             | NC_013349.1                 |                           | <i>Staphylococcus aureus</i>      | As                                                                                   |
| pSsal-M18                 | EGX29383.1                                         | SAP099B                             | AGBV01000006.1              |                           | <i>Streptococcus salivarius</i>   | lantibiotic                                                                          |
| pSRQ700                   | NP_116729.1                                        | SAP099B                             | NC_002798.1                 |                           | <i>Lactococcus lactis</i>         |                                                                                      |
| pTRACA42                  | AEJ88199.1                                         | pTRACA42                            | HMS60025.1                  |                           | <i>Uncultured bacterium</i>       |                                                                                      |
| pPB1                      | YP_138219.1                                        | pPB1                                | NC_006399.1                 | YP_138221.1               | <i>Lactobacillus plantarum</i>    |                                                                                      |
| unnamed                   | EEU83768.1                                         | pPB1                                | GG688636.1                  |                           | <i>Enterococcus faecalis</i>      |                                                                                      |
| pCI411                    | NP_862729.1                                        | pPB1                                | NC_004992.1                 |                           | <i>Leuconostoc lactis</i>         |                                                                                      |
| pCL2.1                    | NP_862690.2                                        | pPB1                                | NC_004981.2                 |                           | <i>Lactococcus lactis</i>         |                                                                                      |
| pTXW                      | YP_003517728.1                                     | pTXW                                | NC_013952.1                 | YP_003517730.1            | <i>Lactobacillus paracasei</i>    |                                                                                      |
| pWCZ                      | YP_007027013.1                                     | pTXW                                | NC_019669.1                 | YP_007027014.1            | <i>Lactobacillus paracasei</i>    |                                                                                      |
| pLA106                    | NP_862699.1                                        | pTXW                                | NC_004985.1                 | NP_862697.1               | <i>Lactobacillus acidophilus</i>  |                                                                                      |
| pA1                       | YP_001586276.1                                     | pA1                                 | NC_010098.1                 |                           | <i>Lactobacillus plantarum</i>    |                                                                                      |
| pAR141                    | YP_003422581.1                                     | pA1                                 | NC_013783.1                 |                           | <i>Lactococcus lactis</i>         |                                                                                      |
| pK50-2                    | YP_004169113.1                                     | pA1                                 | NC_014936.1                 |                           | <i>Lactobacillus reuteri</i>      |                                                                                      |
| p121B5                    | NP_862542.1                                        | pA1                                 | NC_004957.1                 |                           | <i>Lactobacillus sp.</i>          | Ery                                                                                  |
| unnamed                   | ACL81264.1                                         | pA1                                 | FJ489650.1                  |                           | <i>Lactobacillus reuteri</i>      | Ery                                                                                  |
| pLB4                      | AAA25254.1                                         | pLB4                                | M33531.1                    | AAA25252.1                | <i>Lactobacillus plantarum</i>    |                                                                                      |
| pBM02                     | NP_862030.1                                        | pLB4                                | NC_004930.1                 | NP_862027.1               | <i>Lactococcus lactis</i>         |                                                                                      |
| pKL001                    | YP_002332312.1                                     | pLB4                                | NC_011610.1                 |                           | <i>Lactococcus lactis</i>         |                                                                                      |
| pLR001                    | YP_002221597.1                                     | pLB4                                | NC_011223.1                 |                           | <i>Lactobacillus rhamnosus</i>    | bacterial lysis                                                                      |
| pMRI_5.2                  | YP_007215176.1                                     | pLB4                                | NC_019900.1                 | YP_007215174.1            | <i>Lactobacillus plantarum</i>    |                                                                                      |
| pLFE1                     | YP_002842049.1                                     | pLB4                                | NC_012628.1                 | YP_002842050.1            | <i>Lactobacillus plantarum</i>    | Ery                                                                                  |
| pCD034-2                  | YP_004869654.1                                     | pLB4                                | NC_016034.1                 | YP_004869655.1            | <i>Lactobacillus buchneri</i>     |                                                                                      |
| pTRACA66                  | AEJ88207.1                                         | pTRACA66                            | HMS60028.1                  |                           | <i>uncultured bacterium</i>       |                                                                                      |
| pHPK255                   | AAB21515.1                                         | pHPK255                             | S84689.1                    |                           | <i>Helicobacter pylori</i>        |                                                                                      |
| p2HPAKL117                | YP_007018095.1                                     | pHPK255                             | NC_019562.1                 |                           | <i>Helicobacter pylori</i>        |                                                                                      |
| p2HPAKL86                 | YP_007019483.1                                     | pHPK255                             | NC_019565.1                 |                           | <i>Helicobacter pylori</i>        |                                                                                      |
| pAL236-2                  | YP_003650625.1                                     | pHPK255                             | NC_014162.1                 |                           | <i>Helicobacter pylori</i>        |                                                                                      |
| pHP489                    | NP_045217.1                                        | pHPK255                             | NC_001843.1                 |                           | <i>Helicobacter pylori</i>        |                                                                                      |
| pAL236-5                  | YP_003650626.1                                     | pHPK255                             | NC_014163.1                 |                           | <i>Helicobacter pylori</i>        |                                                                                      |
| pADB201                   | NP_040430.2                                        | pADB201                             | NC_001382.1                 |                           | <i>Mycoplasma mycoides</i>        |                                                                                      |
| pBG7AU                    | NP_066396.1                                        | pADB201                             | NC_002569.1                 |                           | <i>Mycoplasma leachii</i>         |                                                                                      |
| pMG2A-1                   | YP_007183017.1                                     | pADB201                             | NC_019794.1                 |                           | <i>Mycoplasma capricolum</i>      |                                                                                      |
| pMG2B-1                   | YP_007173692.1                                     | pADB201                             | NC_019785.1                 |                           | <i>Mycoplasma yeatsii</i>         |                                                                                      |
| pMG2C-1                   | YP_007183019.1                                     | pADB201                             | NC_019795.1                 |                           | <i>Mycoplasma cottewii</i>        |                                                                                      |
| pMG2D-1                   | YP_007173696.1                                     | pADB201                             | NC_019787.1                 |                           | <i>Mycoplasma capricolum</i>      |                                                                                      |
| pMG2E-1                   | YP_007173694.1                                     | pADB201                             | NC_019786.1                 |                           | <i>Mycoplasma cottewii</i>        |                                                                                      |
| pMG2F-1                   | YP_007183023.1                                     | pADB201                             | NC_019797.1                 |                           | <i>Mycoplasma yeatsii</i>         |                                                                                      |

<sup>a</sup>: Plasmids whose replication proteins were retrieved by a PSI-BLAST using RepB\_pMV158 as a query are listed.

<sup>b</sup>: It locates the corresponding plasmid in one of the cartooned clusters of Supplementary Figure S1, for each of which a prototype was selected.

<sup>c</sup>: Antibiotic or metal resistance to Tc: tetracycline; MLS(B): macrolide/lincosamide/streptogramin B; Lin: lincosamide; Mac, macrolides; PLS(A), pleuromutilins/lincosamide/streptogramin A; Ery: erythromycin; As, arsenate.
