# Supplementary material
Source: PubMed Central journal article supplement (PMC7103276)
Supplement: mmc3.pdf [file mmc3.pdf]

Supplementary Table S2: Prototype RCR and MOB<sub>V1</sub> plasmids (ordered by host)

| Plasmid/ICE name <sup>a</sup> | GenBank Acc. No. | Relaxase GenBank Acc. No. <sup>b</sup> | Replication initiation protein GenBank Acc. No. | Host                              | Order           |
|-------------------------------|------------------|----------------------------------------|-------------------------------------------------|-----------------------------------|-----------------|
| pMV158                        | NC_010096.1      | YP_001586274                           | YP_001586272.1                                  | <i>Streptococcus agalactiae</i>   | Lactobacillales |
| pGB2001                       | NC_015973.1      | YP_004831119.1                         | YP_004831118.1                                  | <i>Streptococcus agalactiae</i>   |                 |
| pGB2002                       | NC_015971.1      | YP_004831084.1                         | YP_004831083.1                                  | <i>Streptococcus agalactiae</i>   |                 |
| pSBO2                         | AB021465.1       | BAA75017.1                             | BAA75016.1                                      | <i>Streptococcus bovis</i>        |                 |
| p5580                         | NC_019370.1      | YP_006965545.1                         | YP_006965544.1                                  | <i>Streptococcus dysgalactiae</i> |                 |
| ICESgal1                      | FN597254.1       | CBI14176.1                             | CBI14175.1                                      | <i>Streptococcus gallolyticus</i> |                 |
| pGA2000                       | NC_019252.1      | YP_006961085.1                         | YP_006961084.1                                  | <i>Streptococcus pyogenes</i>     |                 |
| pRW35                         | NC_010423.2      | YP_001716200.1                         | YP_001716199.1                                  | <i>Streptococcus pyogenes</i>     |                 |
| pSsal-M18                     | AGBV01000006.1   |                                        | EGX29383.1                                      | <i>Streptococcus salivarius</i>   |                 |
| pSSU1                         | NC_002140.1      | NP_053061.1                            | NP_053058.1                                     | <i>Streptococcus suis</i>         |                 |
| pER13                         | NC_002776.1      | NP_115336.1                            | NP_115335.1                                     | <i>Streptococcus thermophilus</i> |                 |
| pSMQ172                       | NC_004958.1      | NP_862547.1                            | NP_862546.1                                     | <i>Streptococcus thermophilus</i> |                 |
| pGL2                          | NC_016981.1      | YP_005352352.1                         | YP_005352348.1                                  | <i>Lactococcus garvieae</i>       |                 |
| pBM02                         | NC_004930.1      | NP_862027.1                            | NP_862030.1                                     | <i>Lactococcus lactis</i>         |                 |
| pWV01                         | NC_002192.1      |                                        | NP_053450.1                                     | <i>Lactococcus lactis</i>         |                 |
| pLA106                        | NC_004985.1      | NP_862697.1                            | NP_862699.1                                     | <i>Lactobacillus acidophilus</i>  |                 |
| pCD034-2                      | NC_016034.1      | YP_004869655.1                         | YP_004869654.1                                  | <i>Lactobacillus buchneri</i>     |                 |
| pSMA23                        | NC_010242.1      | YP_001649176.1                         | YP_001649177.1                                  | <i>Lactobacillus casei</i>        |                 |
| pRCEID2.9                     | NC_017466.1      | YP_005849229.1                         | YP_005849231.1                                  | <i>Lactobacillus casei</i>        |                 |
| pTXW                          | NC_013952.1      | YP_003517730.1                         | YP_003517728.1                                  | <i>Lactobacillus paracasei</i>    |                 |
| pWCZ                          | NC_019669.1      | YP_007027014.1                         | YP_007027013.1                                  | <i>Lactobacillus paracasei</i>    |                 |
| pLB4                          | M33531.1         | AAA25252.1                             | AAA25254.1                                      | <i>Lactobacillus plantarum</i>    |                 |
| pMRI_5.2                      | NC_019900.1      | YP_007215174.1, YP_007215171.1         | YP_007215171.1                                  | <i>Lactobacillus plantarum</i>    |                 |
| pPB1                          | NC_006399.1      | YP_138221.1                            | YP_138219.1                                     | <i>Lactobacillus plantarum</i>    |                 |
| pLFE1                         | NC_012628.1      | YP_002842050.1                         | YP_002842049.1                                  | <i>Lactobacillus plantarum</i>    |                 |
| pYSI8                         | NC_010936.1      | YP_001967741.1                         | YP_001967739.1                                  | <i>Lactobacillus sakei</i>        |                 |
| pLS55                         | NC_010375.1      | YP_001691307.1                         | YP_001691308.1                                  | <i>Lactobacillus sakei</i>        |                 |
| LkipL48                       | NC_014135.1      | YP_003620509.1                         | YP_003620511.1                                  | <i>Leuconostoc kimchii</i>        |                 |
| pMBLR00                       | NC_019353.1      | YP_006964795.1                         | YP_006964794.1                                  | <i>Leuconostoc mesenteroides</i>  |                 |
| pE33L5                        | NC_007104.1      | YP_245942.1                            | YP_245944.1                                     | <i>Bacillus cereus</i>            | Bacillales      |
| p1414                         | NC_002075.1      | NP_049443.1                            | NP_049435.1                                     | <i>Bacillus subtilis</i>          |                 |
| pGI1                          | NC_004335.1      | NP_705753.1                            | NP_705751.1                                     | <i>Bacillus thuringiensis</i>     |                 |
| pMA67                         | NC_010875.1      | YP_001966010.1                         | YP_001966008.1                                  | <i>Paenibacillus larvae</i>       |                 |
| pT181                         | NC_001393.1      | NP_040472.1                            | NP_040469.1                                     | <i>Staphylococcus aureus</i>      |                 |
| pUB110                        | NC_001384.1      | NP_040431.1                            | NP_040434.1                                     | <i>Staphylococcus aureus</i>      |                 |
| pCPS49                        | NC_019142.1      | YP_006958108.1                         | YP_006958109.1                                  | <i>Staphylococcus aureus</i>      |                 |
| pE194                         | NC_005908.1      | YP_025317.1                            | AAA25603.1                                      | <i>Staphylococcus aureus</i>      |                 |
| SAP085B                       | NC_013345.1      | YP_006938616.1                         | YP_006938614.1                                  | <i>Staphylococcus aureus</i>      |                 |
| pC194                         | NC_002013.1      |                                        | NP_040435.3                                     | <i>Staphylococcus aureus</i>      |                 |
| pC221                         | NC_006977.1      | YP_232728.1 (MOB <sub>p77</sub> )      | YP_232726.1                                     | <i>Staphylococcus aureus</i>      |                 |

<sup>a</sup>: Prototype plasmids used in Figure 6 are listed.

<sup>b</sup>: Unless otherwise indicated, all relaxases belong to MOB<sub>V1</sub> subfamily.
